# Supplementary material for: Natural forest-inspired Ag lithiophilic porous arrays grown in Cu foam hosts with bi-continuous electronic/ionic pathways for highly stable Li metal anodes
Source: Royal Society of Chemistry journal article supplement (doi:10.1039/d1ta04927e), 2021-01-01
Supplement: d1ta04927e3.pdf [file d1ta04927e3.pdf]

## Supplementary Information

### **Natural forest-inspired Ag lithiophilic porous arrays grown in the Cu foam hosts with bi-continuous electronic/ionic pathways for highly stable Li metal anodes**

Lulu Wu, Weiwei Jiang, Hantao Zou, Chengzhou Ye, Jing Zhang, Guojun Xu, Xiaomin Li, Zhihao Yue, Fugen Sun\*, Lang Zhou

*Institute of Photovoltaics, Nanchang University, 999 Xuefu Road, Nanchang, 330031, China*

Corresponding author : Fugen Sun

E-mail : sunfugen@ncu.edu.cn

Address: *Institute of Photovoltaics, Nanchang University, 999 Xuefu Road, Nanchang, 330031, China*

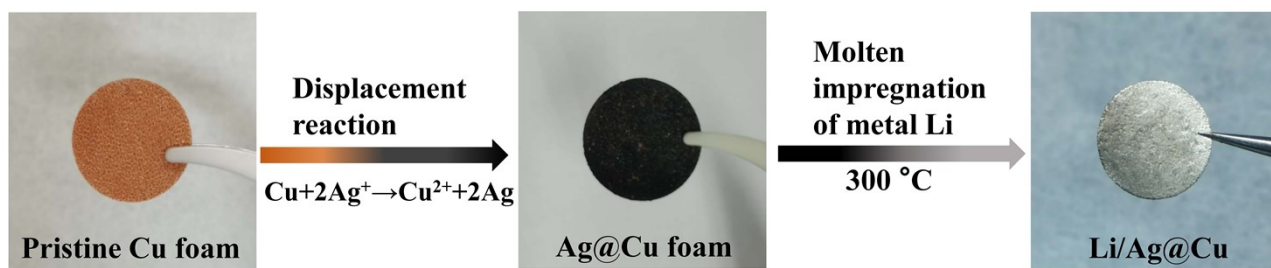

**Fig. S1.** Photographs of the pristine Cu, Ag@Cu foams and Li/Ag@Cu composites.

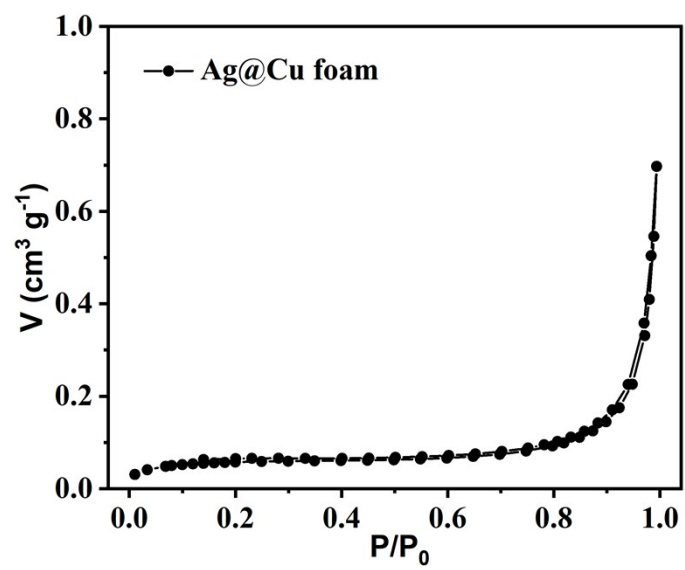

**Fig. S2.**  $\text{N}_2$  adsorption-desorption isotherms of the Ag@Cu foams.

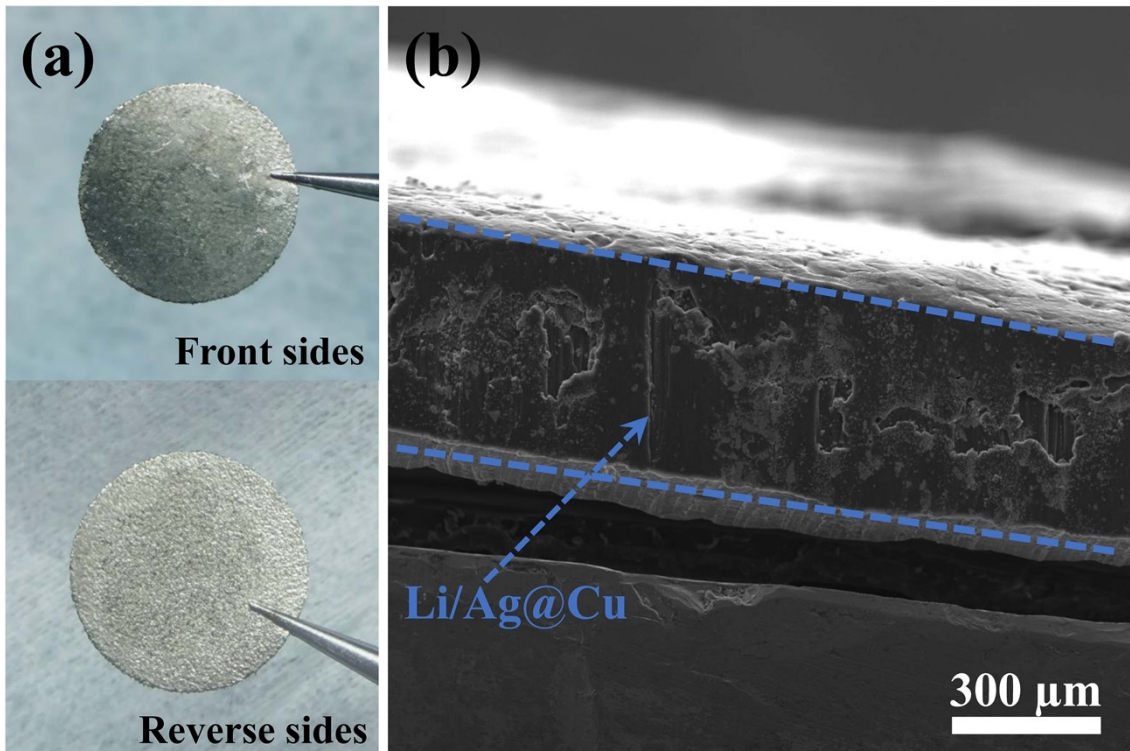

**Fig. S3.** (a) Photographs of different sides of the Li/Ag@Cu sheets and (b) the SEM image of the cross-section side of the cut Li/Ag@Cu sheets.

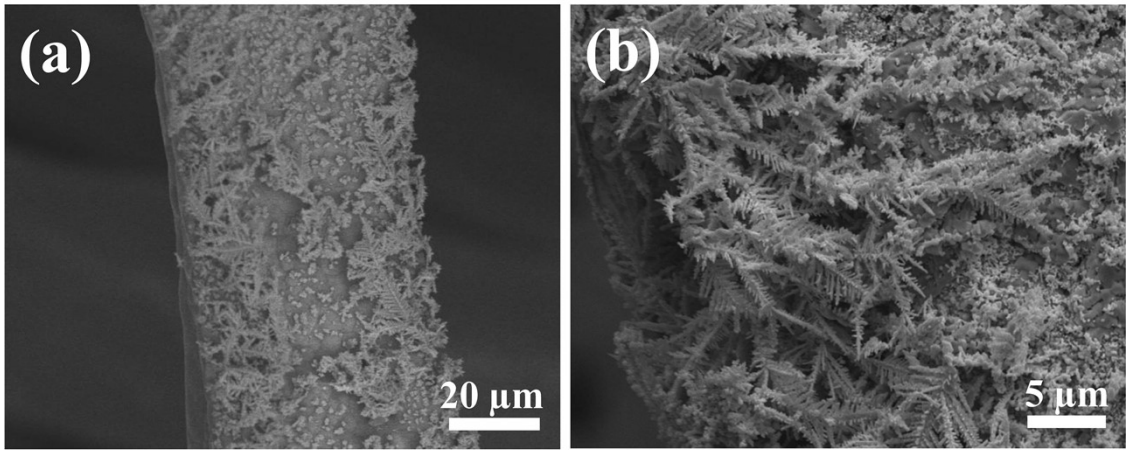

**Fig. S4.** (a-b) SEM image of the Li/Ag@Cu anodes after fully stripping of metal Li.

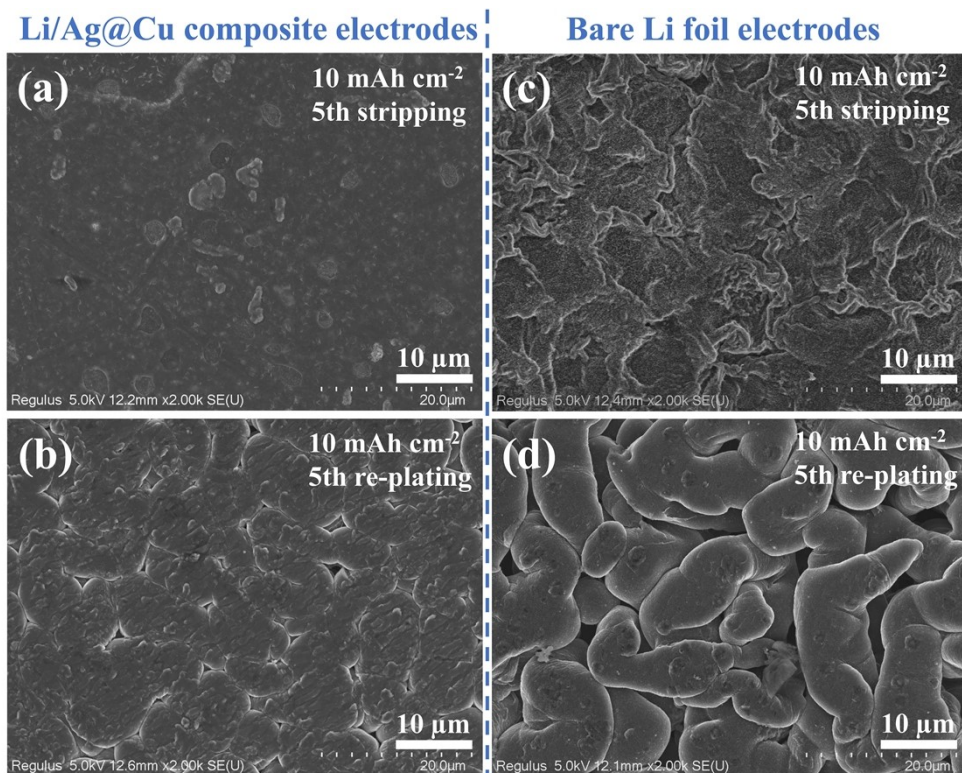

**Fig. S5.** SEM images of the Li/Ag@Cu composite electrodes after (a) 5th Li stripping and (b) 5th Li re-plating with a capacity of  $10 \text{ mAh cm}^{-2}$  at a current density of  $5 \text{ mA cm}^{-2}$ . SEM images of the bare Li electrodes after (c) 5th Li stripping and (d) 5th Li re-plating with a capacity of  $10 \text{ mAh cm}^{-2}$  at a current density of  $5 \text{ mA cm}^{-2}$ .

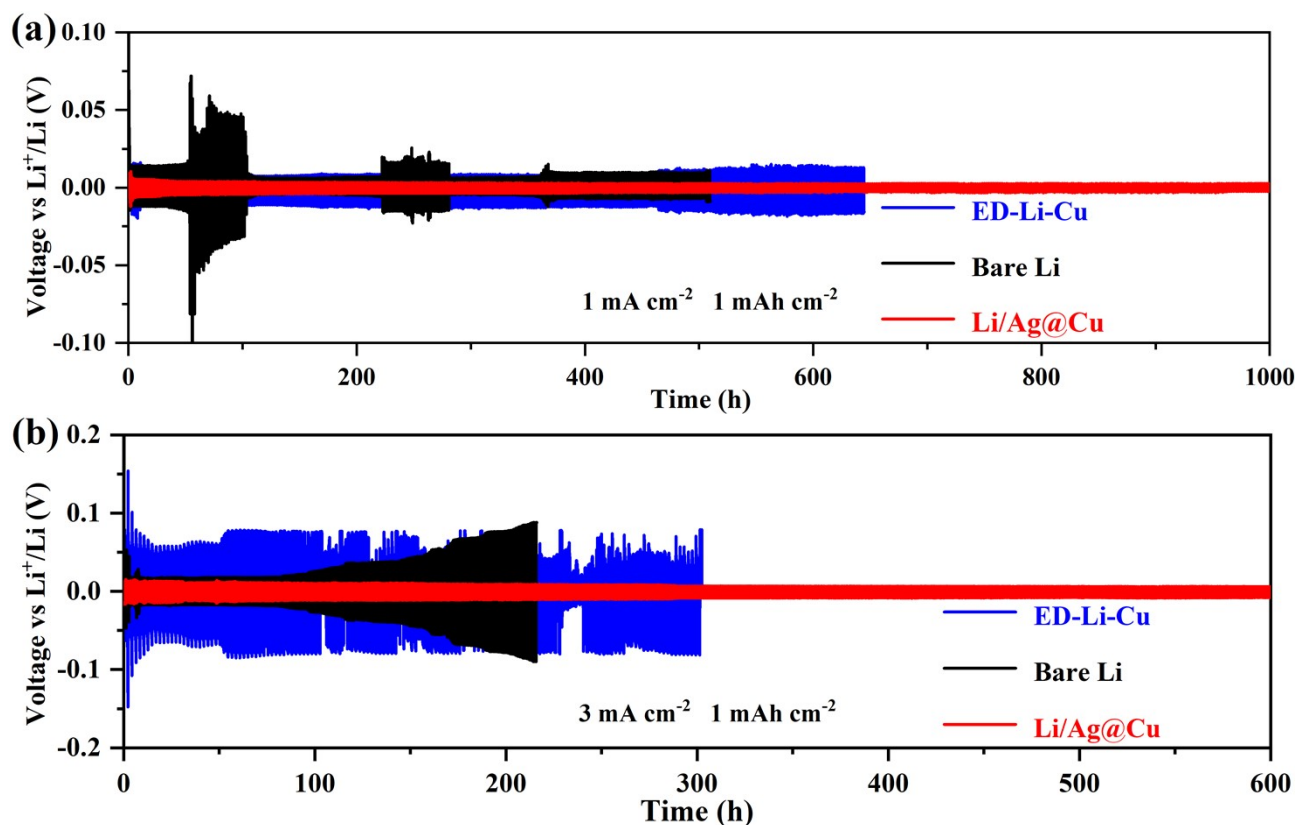

**Fig. S6.** Galvanostatic charge/discharge voltage profiles of the bare Li, ED-Li-Cu and Li/Ag@Cu composite electrodes in symmetric cells at the current density of (a)  $1 \text{ mA cm}^{-2}$  and (b)  $3 \text{ mA cm}^{-2}$  with the cycling capacity of  $1 \text{ mAh cm}^{-2}$ . For the further comparison of symmetrical cells, the Li composite anodes based on the Cu and Ag@Cu foam hosts should be firstly prepared. Unfortunately, the bare Cu foams without Ag modification cannot be wetted and filled by the molten Li. The molten Li impregnation method, which is facile and effective for the fabrication of the Li/Ag@Cu composite anode in our manuscript, is not suitable to prepare the metal Li and Cu composites. Therefore, the Li-Cu composite anodes are prepared by the electrochemical deposition of  $10 \text{ mAh cm}^{-2}$  Li into the bare Cu foams (denoted as ED-Li-Cu) for the symmetric cell testing. It is found that, at the current density of  $1 \text{ mA cm}^{-2}$  and cycling capacity of  $1 \text{ mAh cm}^{-2}$ , the ED-Li-Cu electrodes present an overpotential of  $\sim 20 \text{ mV}$  during cycles, which is much higher than the Li/Ag@Cu electrodes. When the current densities increase to  $3 \text{ mA cm}^{-2}$ , the ED-Li-Cu electrodes still display higher overpotentials with irregular fluctuation. These results further confirm that the lithiophobic Cu surfaces without Ag modification bring about large barriers for electrochemical nucleation and deposition of Li, and the uncontrollable growth of Li dendrites in the large pores of Cu foams is inevitable after Li stripping/plating cycles.

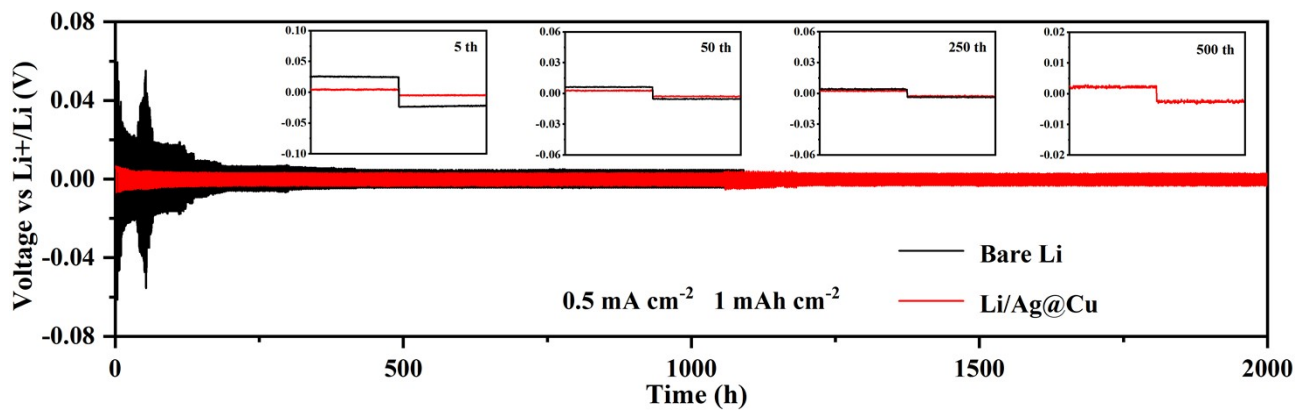

**Fig. S7.** Galvanostatic discharge/charge voltage profiles of the bare Li and Li/Ag@Cu composite electrodes in symmetric cells at the current density of  $0.5 \text{ mA cm}^{-2}$  and the cycling capacity of  $1 \text{ mAh cm}^{-2}$ .



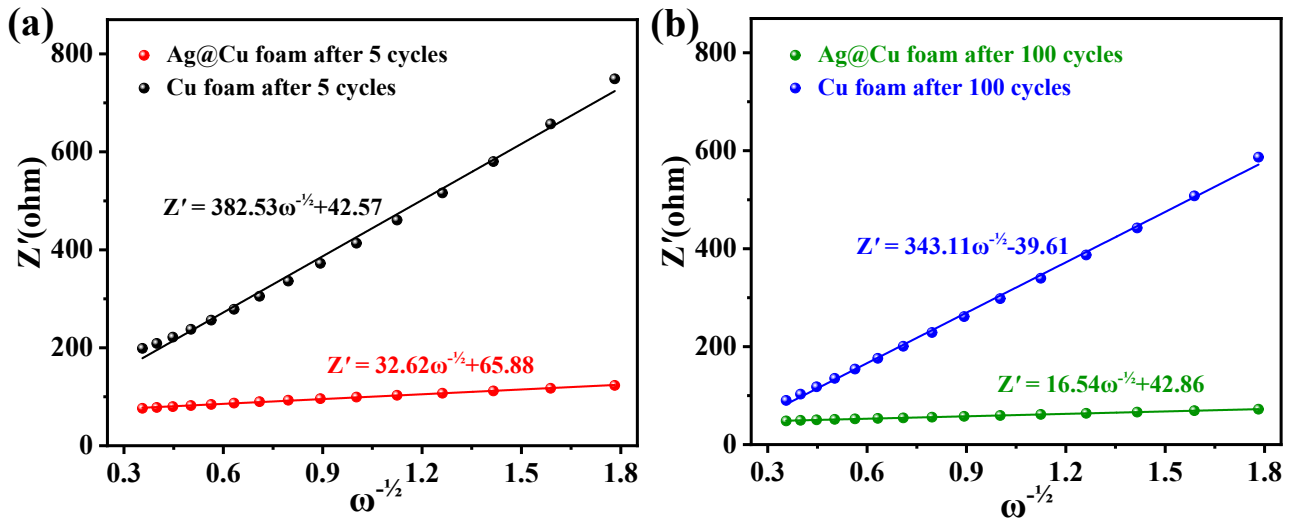

**Fig. S8.** Linear relationships between  $Z'$  and  $\omega^{-1/2}$  from the EIS spectra of the asymmetric cells of the pristine Cu and Ag@Cu foams (a) after the 5th and (b) 100th cycles in Figure 5b. The  $D_{Li^+}$  can be calculated based on the inclined lines at the low-frequency regions of the Nyquist plots. The

equation can be expressed as 
$$D_{Li^+} = \frac{R^2 T^2}{2A^2 n^4 F^4 C^2 \sigma^2}$$
, where  $R$  is the gas constant,  $T$  is the room temperature in our experiment,  $A$  is the surface area of the electrode,  $n$  is the number of the electrons per molecule attending the electronic transfer reaction,  $F$  is the Faraday constant,  $C$  is the concentration of lithium ion in solid electrode and  $\sigma$  is the slope of the line  $Z' - \omega^{-1/2}$ . It is calculated that  $D_{Li^+}$  of the Ag@Cu foams are  $1.01 \times 10^{-10}$  and  $3.70 \times 10^{-10} \text{ cm}^2 \text{ S}^{-1}$  after the 5th and 100th cycles, which are much higher than those of the bare Cu foams ( $7.36 \times 10^{-13}$  and  $9.15 \times 10^{-13} \text{ cm}^2 \text{ S}^{-1}$ ), indicating the enhanced Li-ion transport in the Ag@Cu foam.

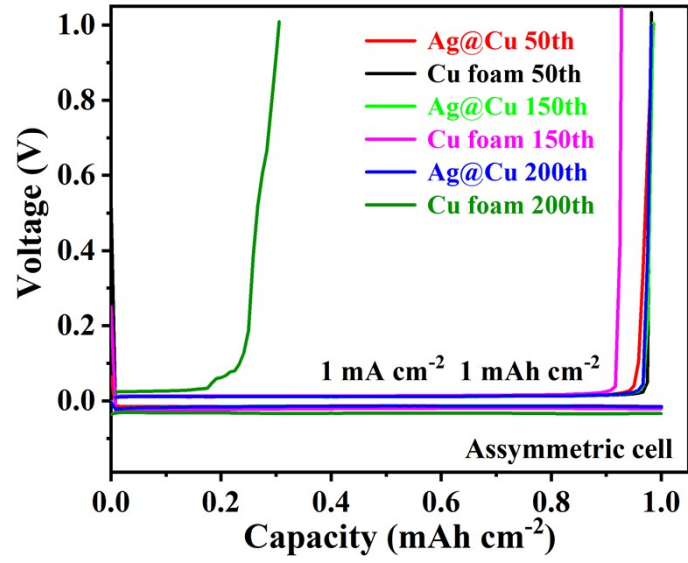

**Fig. S9.** Voltage-capacity profiles of the asymmetric cells of the pristine Cu and Ag@Cu foams at the current density of  $1 \text{ mA cm}^{-2}$  with the capacity of  $1 \text{ mAh cm}^{-2}$ .

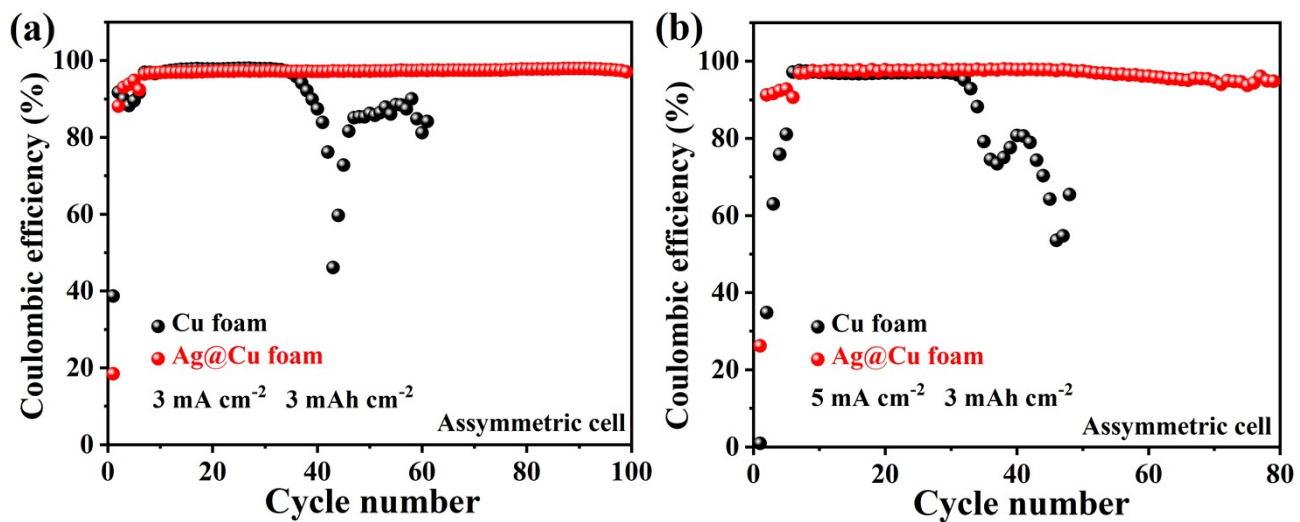

**Fig. S10.** The Coulombic efficiencies of the asymmetric cells of the pristine Cu and Ag@Cu foams at the current density of (a) 3 mA cm<sup>-2</sup> and (b) 5 mA cm<sup>-2</sup> with the Li capacity of 3 mAh cm<sup>-2</sup>.

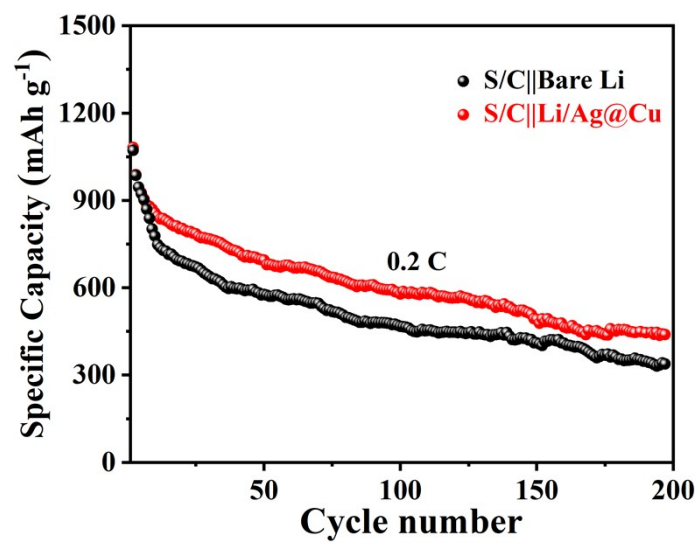

**Fig. S11.** Cycling performances of the S/C||Li/Ag@Cu and S/C||Li cells at 0.2 C. The mass loading of S in the cathode is  $\sim 1.1 \text{ mg cm}^{-2}$ .

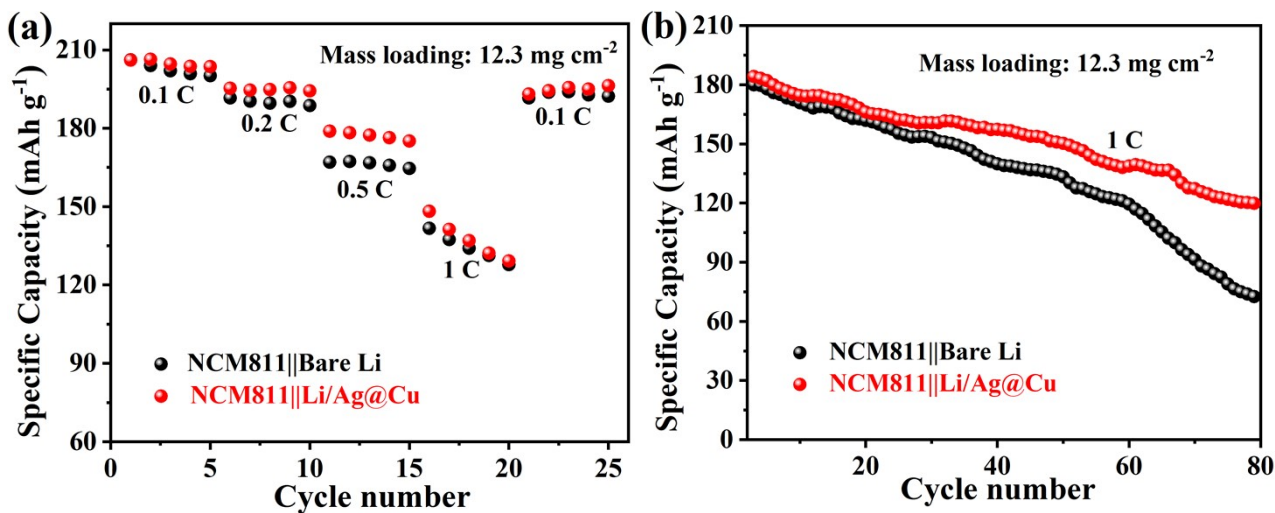

**Fig. S12.** (a) Rate performances and (b) cycling stabilities of the NCM811||Li/Ag@Cu and NCM811||Li cells. The mass loading of NCM811 in the cathodes is controlled to be  $\sim 12.3 \text{ mg cm}^{-2}$ , and the N/P ratio of the NCM811 cathode to the Li/Ag@Cu anode is  $\sim 2.0$ .

**Table S1.** Comparison of the electrochemical performances of symmetric cells of Li/Ag@Cu anodes with the previously-reported Li composite anodes based on 3D hosts which are modified by the Ag nanoparticles or other lithiophilic materials in literatures.

| Ref. | Li composite anodes                   | Lithiophilic modifiers                                                   | Current densities (mA cm <sup>-2</sup> ) | Area capacities (mAh cm <sup>-2</sup> ) | Cycle numbers | Cycle times (h) | Stable overpotentials (mV) |
|------|---------------------------------------|--------------------------------------------------------------------------|------------------------------------------|-----------------------------------------|---------------|-----------------|----------------------------|
| S1   | 3D Al <sub>2</sub> O <sub>3</sub> /Li | Al <sub>2</sub> O <sub>3</sub> -based                                    | 1                                        | 1                                       | 450           | 900             | 50                         |
|      |                                       | inorganic                                                                | 3                                        | 1                                       | 450           | 300             | 100                        |
|      |                                       | frameworks                                                               | 8                                        | 1                                       | 240           | 60              | 400                        |
| S2   | ISG-CuO/Cu foam@Li                    | CuO submicro-sheets                                                      | 1                                        | 1                                       | 650           | 1300            | 5                          |
|      |                                       |                                                                          | 3                                        | 3                                       | 350           | 700             | 20                         |
|      |                                       |                                                                          | 5                                        | 1                                       | 300           | 120             | 450                        |
| S3   | Co <sub>3</sub> O <sub>4</sub> /NF@Li | Co <sub>3</sub> O <sub>4</sub> nanosheet arrays                          | 1                                        | 1                                       | 225           | 450             | 25                         |
|      |                                       |                                                                          | 3                                        | 1                                       | 167           | 1000            | 40                         |
|      |                                       |                                                                          | 5                                        | 1                                       | 687           | 275             | 120                        |
|      |                                       |                                                                          | 3                                        | 3                                       | 400           | 800             | 200                        |
| S4   | STM@Li                                | Li-Si alloy layers                                                       | 2                                        | 2                                       | 400           | 800             | 50                         |
|      |                                       |                                                                          | 3                                        | 3                                       | 200           | 400             | 60                         |
| S5   | 3D Cu <sub>2</sub> S NWs/Cu@Li        | Cu <sub>2</sub> S nanowires                                              | 1                                        | 1                                       | 70            | 140             | 30                         |
| S6   | Li-Mn/G foam                          | MnO <sub>2</sub> nanoflake arrays                                        | 1                                        | 1                                       | 800           | 1600            | 96                         |
|      |                                       |                                                                          | 2                                        | 1                                       | 300           | 300             | 100                        |
| S7   | MgO/CC@Li                             | MgO nanosheets                                                           | 1                                        | 1                                       | 250           | 500             | 50                         |
|      |                                       |                                                                          | 3                                        | 1                                       | 90            | 60              | 155                        |
|      |                                       |                                                                          | 5                                        | 1                                       | 55            | 22.5            | 240                        |
| S8   | Ni foam@Li                            | Ni skeletons                                                             | 1                                        | 1                                       | 100           | 200             | 100                        |
|      |                                       |                                                                          | 3                                        | 1                                       | 100           | 67              | 150                        |
|      |                                       |                                                                          | 5                                        | 1                                       | 100           | 40              | 200                        |
| S9   | CFC/Co-NC@Li                          | Co <sub>3</sub> O <sub>4</sub> -embedded N-doped carbon nanoflake arrays | 1                                        | 1                                       | 500           | 1000            | 18                         |
|      |                                       |                                                                          | 3                                        | 1                                       | 300           | 200             | 40                         |
|      |                                       |                                                                          | 5                                        | 1                                       | 250           | 100             | 46                         |
| S10  | CF/Ag-Li                              | Ag nanoparticles                                                         | 1                                        | 1                                       | 200           | 400             | 60                         |
|      |                                       |                                                                          | 3                                        | 3                                       | 80            | 160             | 100                        |
|      |                                       |                                                                          | 10                                       | 10                                      | 30            | 60              | 120                        |
| S11  | GO-Ag@Li                              | Ag nanoparticles                                                         | 1                                        | 1                                       | 100           | 200             | 25                         |
|      |                                       |                                                                          | 2                                        | 1                                       | 150           | 150             | 140                        |
|      |                                       |                                                                          | 3                                        | 1                                       | 300           | 200             | 150                        |
| S12  | Ag-NCNS@Li                            | Ag nanoparticles                                                         | 0.5                                      | 1                                       | 500           | 2000            | 10                         |
|      |                                       |                                                                          | 1                                        | 1                                       | 930           | 2000            | 15                         |

|                     |                 |                                |            |          |             |             |           |
|---------------------|-----------------|--------------------------------|------------|----------|-------------|-------------|-----------|
| S13                 | AgNP/CNFs       | Ag nanoparticles               | 0.5        | 1        | 125         | 500         | 20        |
|                     |                 |                                | 1          | 2        | 100         | 400         | 40        |
| S14                 | CC-Ag@Li        | Ag nanoparticles               | 1          | 1        | 375         | 750         | 25        |
|                     |                 |                                | 2          | 1        | 20          | 20          | 30        |
|                     |                 |                                | 3          | 1        | 30          | 20          | 40        |
|                     |                 |                                | 5          | 1        | 30          | 12          | 50        |
| S15                 | Cu/Ag@Li        | Ag nanoparticles               | 1          | 1        | 200         | 400         | 50        |
|                     |                 |                                | 2          | 2        | 100         | 200         | 100       |
| S16                 | Cu-Ag@Li        | Ag nanoparticles               | 0.5        | 1        | 200         | 800         | 10        |
|                     |                 |                                | 1          | 1        | 450         | 900         | 18        |
|                     |                 |                                | 3          | 1        | 750         | 500         | 35        |
| <b>Our<br/>work</b> | <b>Li/Ag@Cu</b> | <b>Pine-needle-like<br/>Ag</b> | <b>0.5</b> | <b>1</b> | <b>500</b>  | <b>2000</b> | <b>2</b>  |
|                     |                 |                                | <b>1</b>   | <b>1</b> | <b>500</b>  | <b>1000</b> | <b>3</b>  |
|                     |                 |                                | <b>3</b>   | <b>1</b> | <b>900</b>  | <b>600</b>  | <b>6</b>  |
|                     |                 |                                | <b>5</b>   | <b>1</b> | <b>1500</b> | <b>600</b>  | <b>8</b>  |
|                     |                 |                                | <b>3</b>   | <b>3</b> | <b>200</b>  | <b>400</b>  | <b>42</b> |

## References:

- S1. L. Fan, S. Li, L. Liu, W. Zhang, L. Gao, Y. Fu, F. Chen, J. Li, H. Zhuang and Y. Lu, *Adv. Energy Mater.*, 2018, **8**, 1802350.
- S2. Y. Jiang, B. Wang, A. Liu, R. Song, C. Bao, Y. Ning, F. Wang, T. Ruan, D. Wang and Y. Zhou, *Electrochim. Acta.*, 2020, **339**, 135941.
- S3. G. Huang, P. Lou, G. Xu, X. Zhang, J. Liang, H. Liu, C. Liu, S. Tang, Y. Cao and S. Cheng, *J. Alloy. Compd.*, 2019, **817**, 152753.
- S4. X. Yan, L. Liang, X. Han, Z. Qiao, Q. Xie, J. Lin, Z. Meng, L. Wang and D. Peng, *Chem. Eng. J.*, 2020, **373**, 1309-1318.
- S5. Z. Huang, C. Zhang, W. Lv, G. Zhou, Y. Zhang, Y. Deng, H. Wu, F. Kang and Q. Yang, *J. Mater. Chem. A.*, 2018, **7**, 727-732.
- S6. B. Yu, T. Tao, S. Mateti, S. Lu and Y. Chen, *Adv. Funct. Mater.*, 2018, **28**, 1803023.
- S7. B. Liu, Y. Zhang, G. Pan, C. Ai, S. Deng, S. Liu, Q. Liu, X. Wang, X. Xia and J. Tu, *J. Mater. Chem. A.*, 2019, **7**, 21794-21801.
- S8. S. Chi, Y. Liu, W. Song, L. Fan and Q. Zhang, *Adv. Funct. Mater.*, 2017, **27**, 1700348.
- S9. G. Jiang, N. Jiang, N. Zheng, X. Chen, J. Mao, G. Ding, Y. Li, F. Sun and Y. Li, *Energy Storage Mater.*, 2019, **23**, 181-189.
- S10. R. Zhang, C. Xiang, X. Shen, X. Zhang, X. Chen, X. Cheng, Y. Chong, C. Zhao and Q. Zhang, *Joule*, 2018, **2**, 764-777.
- S11. H. Zhuang, P. Zhao and Y. Xu, *Inorg. Chem. Front.*, 2020, **7**, 897-904.
- S12. Q. Sun, W. Zhai, G. Hou, J. Feng, L. Zhang, P. Si, S. Guo and L. Ci, *ACS Sustain. Chem. Eng.*, 2018, **6**, 15219-15227.
- S13. C. Yang, Y. Yao, S. He, H. Xie, E. Hitz and L. Hu, *Adv. Mater.*, 2017, **29**, 1702714.
- S14. C. Hao, H. Jin, H. Liu, N. Cai, C. Gao, P. Zhang and M. Wang, *J. Electroanal. Chem.*, 2020, **878**, 114569.
- S15. Z. Hou, Y. Yu, W. Wang, X. Zhao, Q. Di, Q. Chen, W. Chen, Y. Liu and Z. Quan, *ACS Appl. Mater. Inter.*, 2019, **11**, 8148-8154.
- S16. S. Cui, P. Zhai, W. Yang, Y. Wei, J. Xiao, L. Deng and Y. Gong, *Small*, 2020, **16**, 1905620.
